# Supplementary material
Source: Springer Nature journal article supplement (https://www.springermedizin.de/resource/supplementary/12872_2004_39_MOESM5_ESM.pdf/9430932)

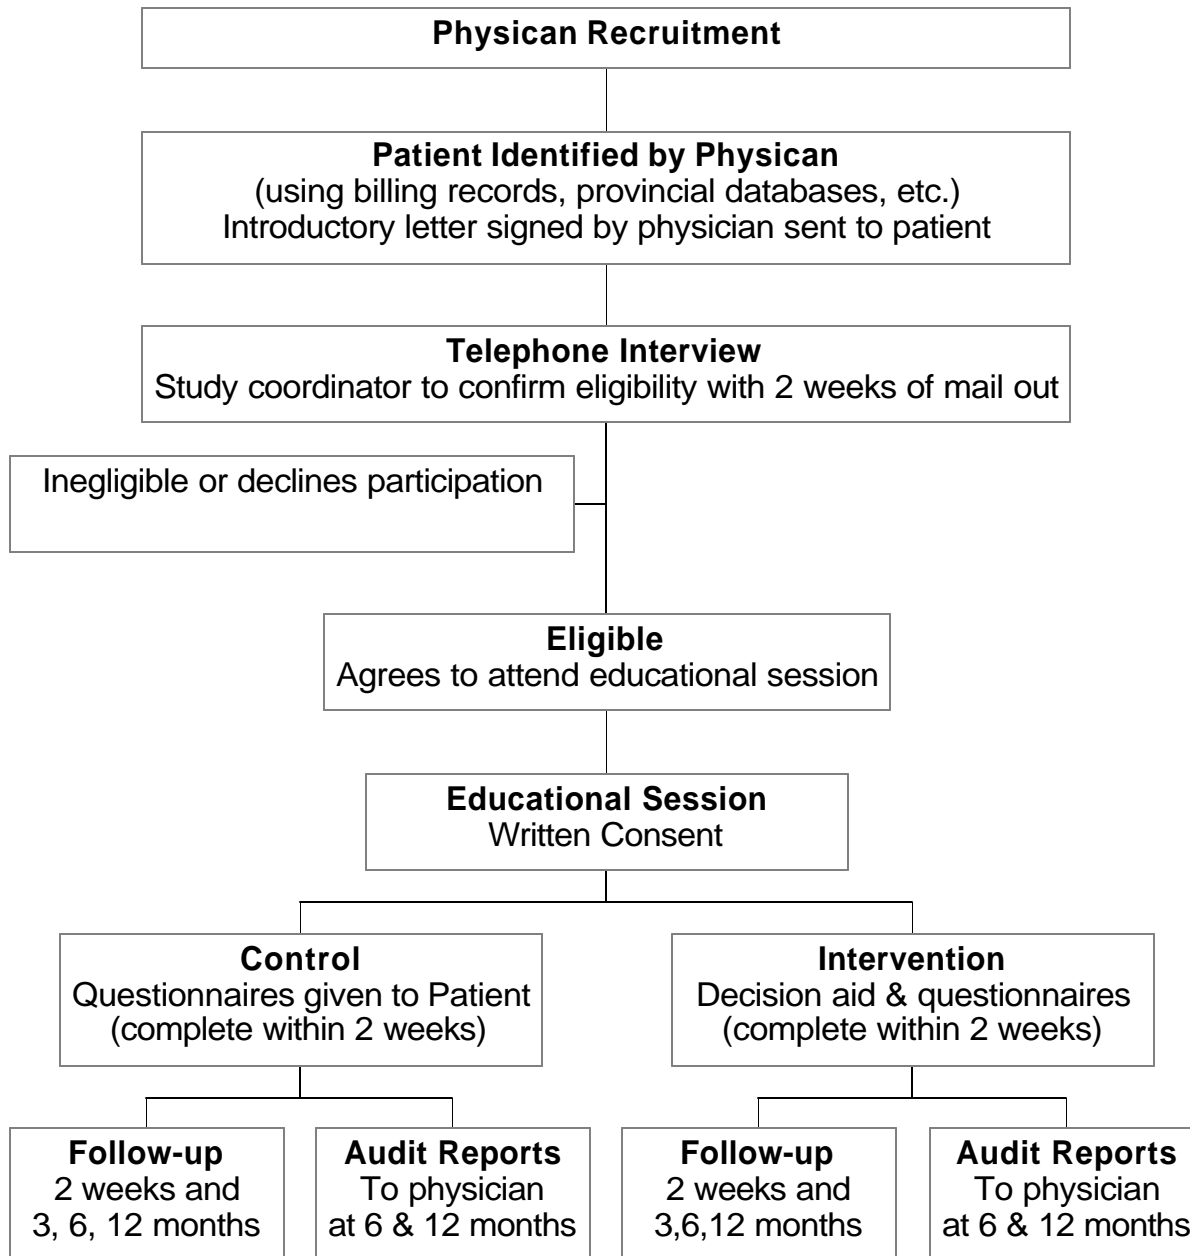

Supplement: MOESM5 [file 9430932]
